# Supplementary material for: Electrochromic polymers with multiple redox couples applied to monitor energy storage states of supercapacitors
Source: Royal Society of Chemistry journal article supplement (doi:10.1039/d0cc00690d), 2020-01-01
Supplement: d0cc00690d1.pdf [file d0cc00690d1.pdf]

# Electronic Supplementary Information

## **Electrochromic polymer with multiple redox couples applied to monitor energy storage states of supercapacitor**

Shouli Ming<sup>a</sup>, Kaiwen Lin<sup>d</sup>, Hui Zhang<sup>c</sup>, Fengxing Jiang<sup>b</sup>, Peipei Liu<sup>b</sup>, Jingkun Xu<sup>a,b,\*</sup>,

Guangming Nie<sup>a,\*</sup>, Xuemin Duan<sup>b</sup>

<sup>a</sup> *College of Chemistry and Molecular Engineering, Qingdao University of Science and Technology, Qingdao 266042, China*

<sup>b</sup> *Department of Physics, Jiangxi Science and Technology Normal University, Nanchang 330013, China*

<sup>c</sup> *National Laboratory of Solid State Microstructures, College of Engineering and Applied Sciences and Collaborative Innovation Centre of Advanced Microstructures, Nanjing University, Nanjing 210093, China*

<sup>d</sup> *Department of Materials and Food, University of Electronic Science and Technology of China Zhongshan Institute, Zhongshan 528402, China*

\* *Corresponding author, E-mail: gmnie@126.com; xujingkun@tsinghua.org.cn.*

### **Material and Instruments**

Unless otherwise noted, all chemicals for the synthesis of monomer were commercially available and used without further purification. For the electrochemical experiments, CH<sub>2</sub>Cl<sub>2</sub> and MeCN were dried before use. Tetrabutylammonium tetrafluoroborate (Bu<sub>4</sub>NBF<sub>4</sub>) as electrolyte was dried at 60 °C for 24 h before use.

NMR spectra were recorded on a Bruker AV 500. UV-visible absorption spectra were obtained on a Varian Cary 5000 UV-Vis-NIR spectrophotometer. The scanning electron microscope (SEM) measurement was performed by JEOL JSM-6700F scanning electron microscope (JEOL Ltd., Japan). Atomic force microscopy (AFM) measurement was performed under ambient conditions using a Veeco Multimode in the tapping mode, and these test samples were heat annealed at 100 °C for 10 min before measure. The X-ray diffraction (XRD) pattern was collected using a PANalytical X'Pert PRO MPD diffractometer with Cu KR radiation. The weight of polymer film was measured by Mettler-Toledo electronic balance with the error of 0.01 mg. The thickness of the polymer film was determined by a Dektak 6 M surface profilometer.

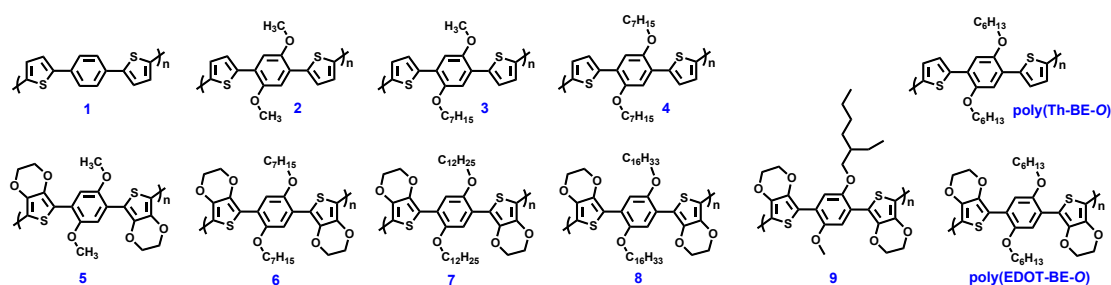

**Fig. S1** Chemical structures of the thiophene-benzene derivatives based copolymers.

**Table S1.** Electrochemical parameters of the thiophene-benzene derivatives based copolymers.

| Polymers | $E_{c,p}$ / V | $E_{a,p}$ / V | Ref |
|----------|---------------|---------------|-----|
| 1        | 0.82          | >1.0          |     |
| 2        | 0.20, 0.58    | 0.64          |     |
| 3        | 0.25, 0.68    | 0.30, 0.65    | 1   |
| 4        | 0.20, 0.61    | 0.40, 0.68    |     |
| 5        | broad         | -0.20         |     |
| 6        | -0.36         | -0.28         | 2   |
| 7        | -0.31         | -0.25         |     |

|                          |                   |               |      |
|--------------------------|-------------------|---------------|------|
| 8                        | -0.40             | -0.30         |      |
| 9                        | -0.55             | -0.15         | 3    |
| Poly(Th-BE- <i>O</i> )   | 0.58, 1.00        | 0.74, 1.13    | This |
| Poly(EDOT-BE- <i>O</i> ) | -0.05, 0.15, 0.55 | 0, 0.20, 0.60 | work |

## DFT calculation

The molecular conformation is an important factor to determine film micromorphology, optical and electrical properties of conjugated polymer. Considering the steric effect of side chain and the non-covalent interaction between oxygen atom in side chain and sulfur atom in thiophene ring (the existence of non-covalent interaction has been proved in previous report<sup>4-6</sup>), the molecular configurations of precursors (EDOT-BE-*O* and Th-BE-*O*) have been studied by density functional theory (DFT) at B3LYP/6-31G level using the Gaussian 09 package. For simplicity, the target molecules with methoxyl groups replacing the long alkoxy chains were employed for this study. As shown in **Fig. S2**, the dihedral angles between thiophene and phenylene are 20.7° for Th-BE-*O* and 10.3° for EDOT-BE-*O*. Moreover, HOMO and LUMO of the two precursors were studied by the DFT calculations. It is found that the oxygen atom in side chain plays a role in electron delocation, which is helpful to improve the capacitance of conducting polymer.

Moreover, HOMO and LUMO of the target polymers have been calculated, as shown in **Fig. S3**. For simplicity, poly(EDOT-BE-*O*) and poly(Th-BE-*O*) were replaced with the dimers of simplified monomers. HOMO and LUMO were -4.60 eV and -1.70 eV for poly(Th-BE-*O*) and -4.10 eV and -1.36 eV for poly(EDOT-BE-*O*), respectively.

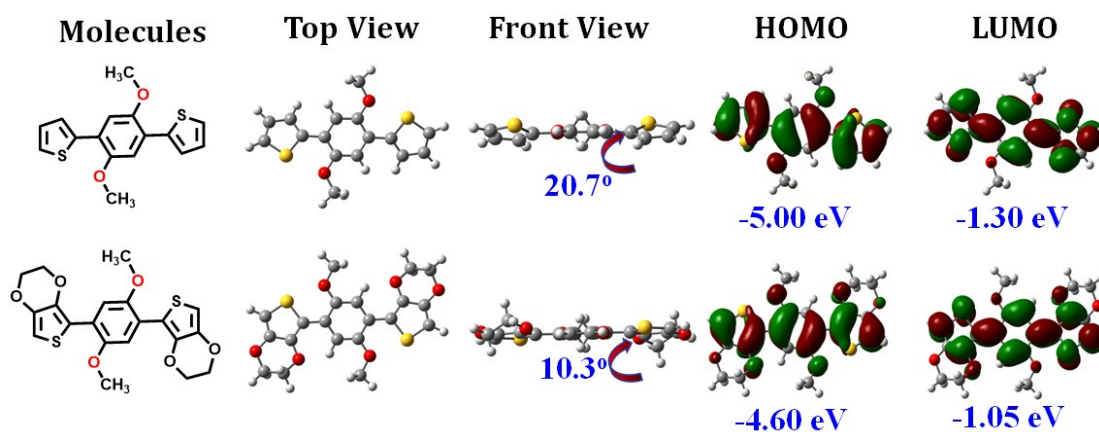

**Fig. S2** Optimal configurations, HOMO and LUMO of simplified monomers.

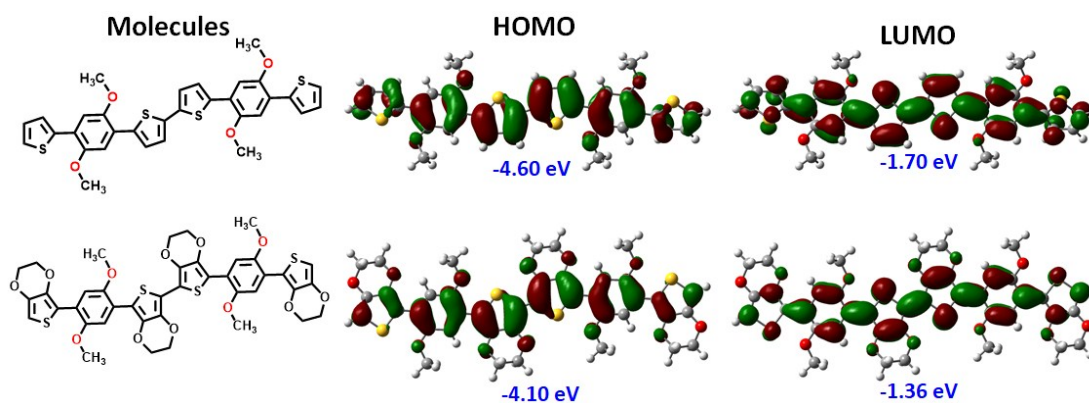

**Fig. S3** Molecular structures, HOMO and LUMO of dimers.

## Synthesis of monomers

### Th-BE-O

A mixture of compounds **1** (1.0 g, 2.30 mmol) and **2** (2.15 g, 5.76 mmol) in DMF was degassed before Pd(PPh<sub>3</sub>)<sub>4</sub> (20 mg) was added. And the mixture was stirred at 100 °C for 8 hours. After the reaction was finished, the mixed solution was poured into 100 ml water, and then extracted with CH<sub>2</sub>Cl<sub>2</sub> (2 × 50 mL). The solvent was moved out with rotary evaporator. The residue was purified on silica gel column to give 0.78 g of light yellow solid. (Yield: 77%). <sup>1</sup>H NMR (500 MHz, CDCl<sub>3</sub>): δ 7.54 (d, 2H), 7.34 (d, 2H), 7.26 (s, 2H), 7.11-7.09 (t, 2H), 4.08 (t, 4H), 1.93-1.87 (m, 4H),

1.56-1.51 (m, 4H), 1.38-1.35 (m, 8H), 0.93-0.90 (m, 6H).

### EDOT-BE-O

The synthetic process of EDOT-BE-O is similar with Th-BE-O. EDOT-BE-O as light yellow solid was prepared by the yield of 81%.  $^1\text{H}$  NMR (500 MHz,  $\text{CDCl}_3$ ):  $\delta$  7.68 (s, 2H), 6.37 (s, 2H), 4.32-4.25 (m, 8H), 4.04 (t, 4H), 1.90-1.85 (m, 4H), 1.52-1.49 (m, 4H), 1.36-1.34 (m, 8H), 0.92-0.89 (m, 6H).

## Electrochemical experiment

Unless otherwise noted, the electrochemical experiments were performed in a standard three-electrode electrolytic cell including a Pt wire working electrode, a Pt wire counter electrode and an Ag/AgCl reference electrode. The electrochemical polymerization of monomer was performed in  $\text{CH}_2\text{Cl}_2/\text{MeCN}$  (v/v=1/1) mixed solvent containing  $0.1 \text{ mol L}^{-1} \text{ Bu}_4\text{NBF}_4$ . The molar concentration of monomer is  $10 \text{ mmol L}^{-1}$ . The electrochemical behaviour of polymer was investigated in  $\text{MeCN}-\text{Bu}_4\text{NBF}_4$  ( $0.1 \text{ mol L}^{-1}$ ).

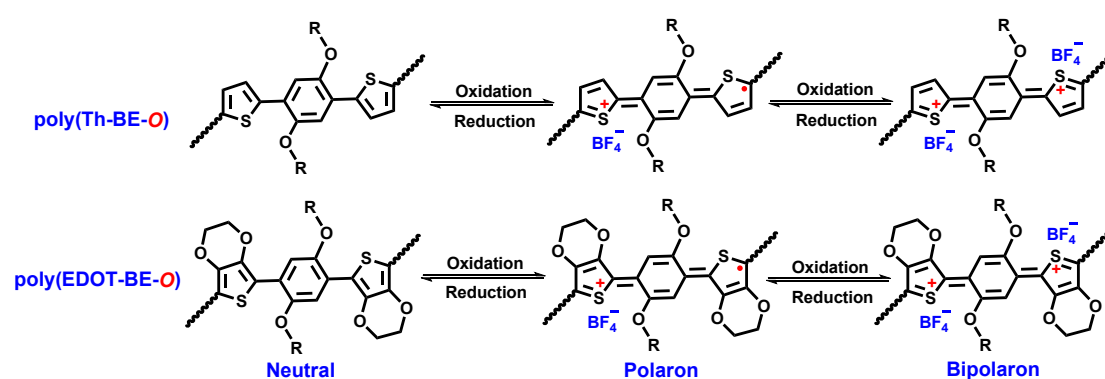

**Fig. S4** Structures of polarons and bipolarons for poly(Th-BE-o) and poly(EDOT-BE-o).

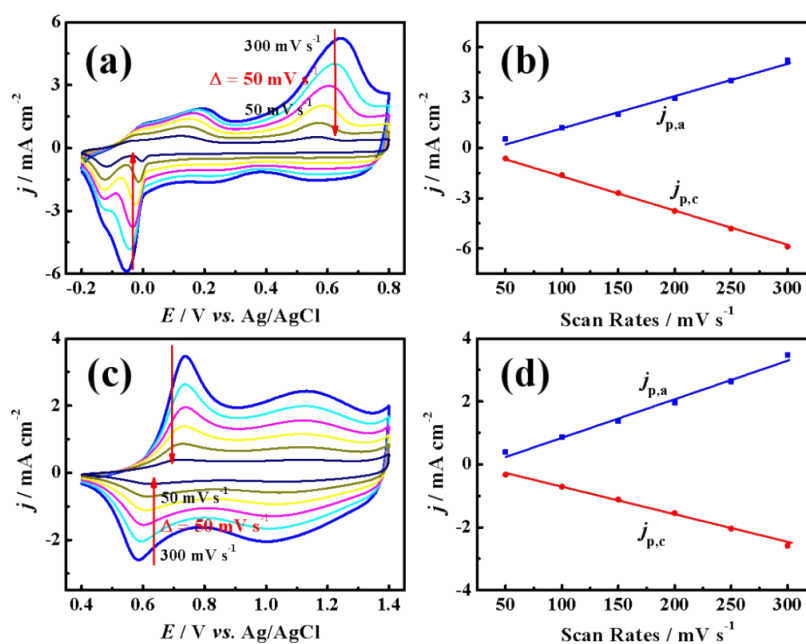

**Fig. S5** (a) CVs of poly(EDOT-BE-*O*) and (b) linear relationship between scan rates and peak current densities; (c) CVs of poly(Th-BE-*O*) and (d) linear relationship between scan rates and peak current densities.

### Electrochromic properties of polymers

Spectroelectrochemical property of polymer was measured in MeCN-Bu<sub>4</sub>NBF<sub>4</sub> (0.1 mol L<sup>-1</sup>) with a Pt wire counter electrode, an Ag/AgCl reference electrode and an ITO glass working electrode (0.8 cm × 5 cm). The thickness of polymer film is about 100 nm. During the experiment, the three-electrode electrolytic cell was fixed in UV-vis spectrometer to ensure real-time absorption monitor of polymer under different potentials.

The electrochromic performance of polymer was characterized by the time-transmittance curves. The potential windows were -0.2 V ~ 0.8 V for poly(EDOT-BE-*O*) and 0.4 V ~ 1.4 V for poly(Th-BE-*O*). The switching time is 5 s. The optical contrast ( $\Delta T$ ), response time and coloration efficiency ( $CE$ ) of polymer were

calculated according to following formulas:

$$\Delta T = |T_{\text{ox}} - T_{\text{neut}}| \quad (1)$$

where  $T_{\text{ox}}$  and  $T_{\text{neut}}$  are the transmittances of polymer at oxidized and neutral states, respectively.

$$\Delta OD = \log(T_{\text{ox}}/T_{\text{neut}}) \quad (2)$$

$$CE = \Delta OD / Q_d \quad (3)$$

where  $Q_d$  is the density of injected/ejected charge for the change of polymer between oxidized and neutral states.

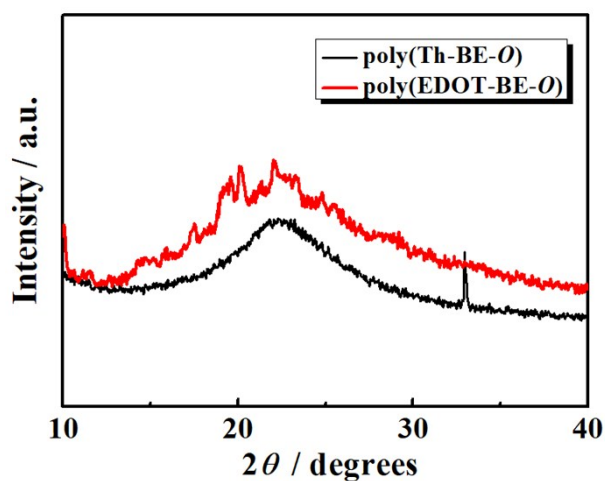

Fig. S6 X-ray diffraction curves of poly(Th-BE-O) and poly(EDOT-BE-O) films.

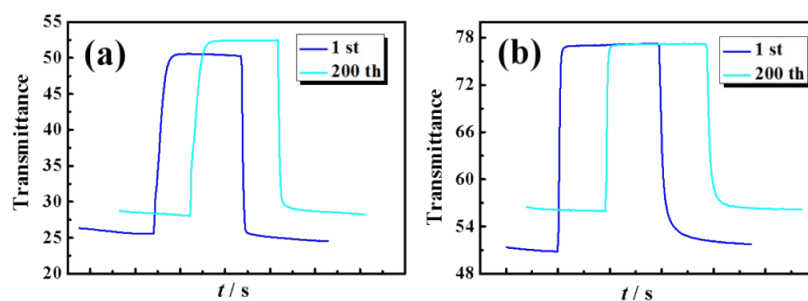

Fig. S7 Optical stability of poly(EDOT-BE-O) (a) at 530 nm and poly(Th-BE-O) (b) at 456 nm in

0.1 M MeCN-Bu<sub>4</sub>NBF<sub>4</sub>.

**Table S2.** The electrochromic parameters of poly(EDOT-BE-O) and poly(Th-BE-O).

| Compound        | Wavelength / nm | $\Delta T$ | Response time / s |           |
|-----------------|-----------------|------------|-------------------|-----------|
|                 |                 |            | Reduction         | Oxidation |
| Poly(EDOT-BE-O) | 530             | 27%        | 0.5               | 2.2       |
|                 | 705             | 10%        | 6.5               | 4.2       |
| Poly(Th-BE-O)   | 456             | 25%        | 2.2               | 0.3       |
|                 | 647             | 11%        | 0.8               | 0.3       |

### Capacitance properties of polymers

For the capacitance and impedance characterization of polymers, Pt wire working electrode is replaced with ITO glass (0.8 cm  $\times$  5 cm). By electrochemical method, polymer was deposited on ITO glass. The thickness of polymer film is about 120 nm. According to CVs of the two polymers, the potential windows were -0.2~0.8 V for poly(EDOT-BE-O) and 0.4~1.4 V for poly(Th-BE-O), respectively. The specific capacitance ( $C$ ) of polymer is calculated by the following formula:

$$C = It/Vm \quad (4)$$

where  $V$  is the charge-discharge potential range;  $m$  is the weight of polymer;  $I$  and  $t$  are the discharge current and discharge time, respectively.

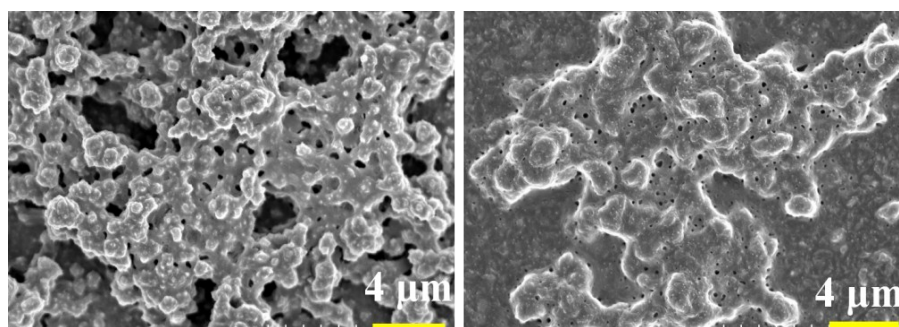

**Fig. S8** SEM images of poly(EDOT-BE-O)- (a) and poly(Th-BE-O)- (b) coated ITO glasses at the magnification of 5000 $\times$ .



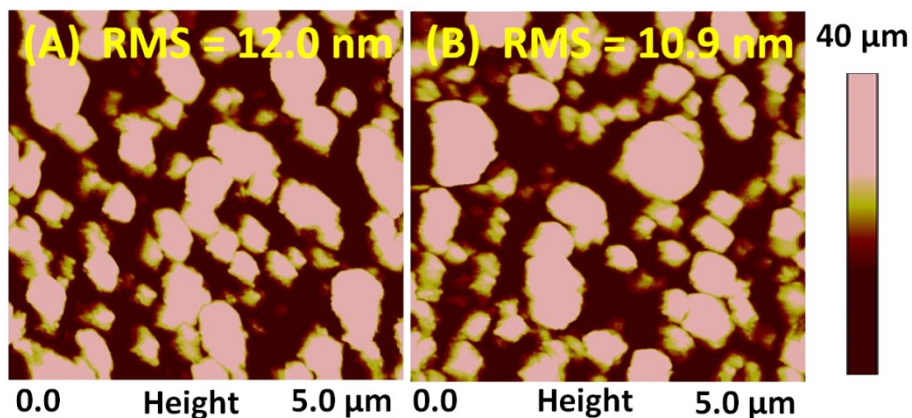

**Fig. S9** AFM height images of poly(EDOT-BE-O)- (a) and poly(Th-BE-O)- (b) coated ITO glasses after heat annealing at 100 °C for 10 min.

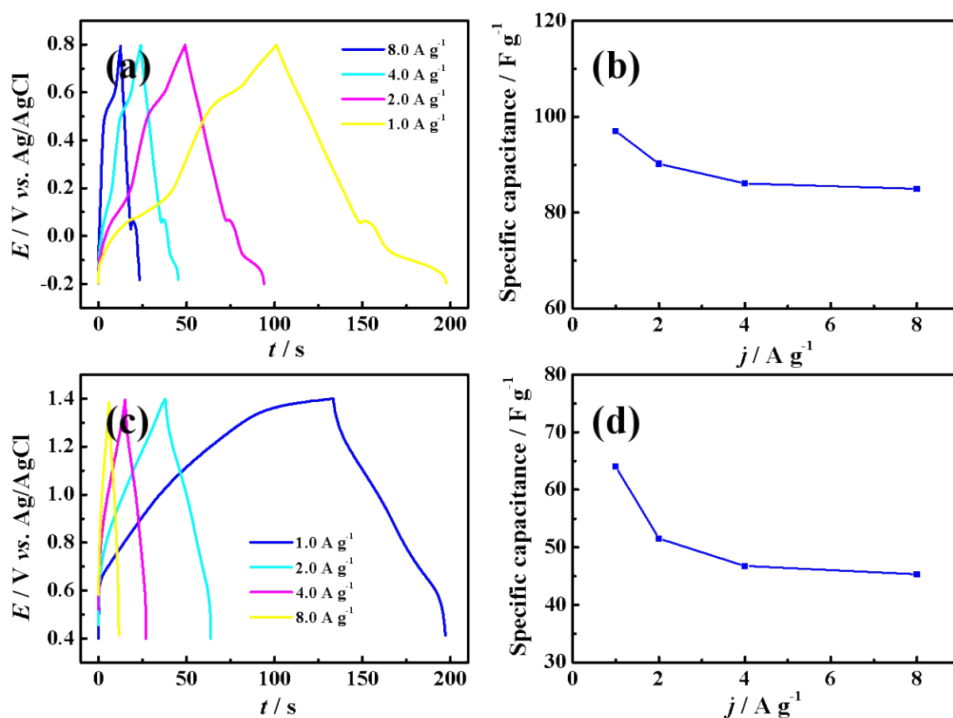

**Fig. S10** (a) Galvanostatic charge-discharge curves and (b) corresponding specific capacitance of poly(EDOT-BE-O) at different current densities; (c) Galvanostatic charge-discharge curves and (d) corresponding specific capacitance of poly(Th-BE-O) at different current densities.

### Preparation of solid-state device

In order to demonstrate the feasibility for the solid-state device, liquid electrolyte

was replaced with gel electrolyte. Gel electrolyte was prepared using  $\text{Bu}_4\text{NBF}_4$ , ACN, poly(methyl methacrylate) and propylene carbonate (mass ratio of 3: 70: 7: 20), which were added together and heated at 70 °C for 30 min. Both working and counter electrodes were indium tin oxide (ITO) glasses. By electrochemical method, poly(EDOT-BE-O) film was deposited on “BUTTERFLY” ITO glass. Then the gel electrolyte and another ITO glass were put on polymer film successively. The solid-state device based on poly(EDOT-BE-O) is shown in **Fig. S11**.

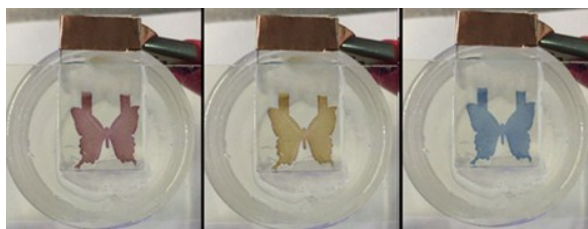

**Fig. S11** Different colours of “BUTTERFLY” shaped solid-state device.

## References

- [1] A. D. Child, B. Sankaran, F. Larmat and J. R. Reynolds, *Macromolecules*, 1995, **28**, 6571-6578.
- [2] J. A. Irvin and J. R. Reynolds, *Polymer*, 1998, **39**, 2339-2347.
- [3] G. Sonmez, H. Meng, and F. Wudl, *Chem. Mater.*, 2004, **16**, 574-580.
- [4] E. M. Galand, J. K. Mwaura, A. A. Argun, K. A. Abboud, T. D. McCarley and J. R. Reynolds, *Macromolecules*, 2006, **39**, 7286-7294.
- [5] N. E. Jackson, B. M. Savoie, K. L. Kohlstedt, M. Olvera de la Cruz, G. C. Schatz, L. X. Chen and M. A. Ratner, *J. Am. Chem. Soc.*, 2013, **135**, 10475-10483.
- [6] J. P. Ruiz, J. R. Dharia, J. R. Reynolds and L. J. Buckley, *Macromolecules*, 1992, **25**, 849-860.
